# Supplementary material
Source: Springer Nature journal article supplement (https://www.springermedizin.de/resource/supplementary/12960_2012_353_MOESM2_ESM.pdf/9569906)

**Institutional/Nomothetic**

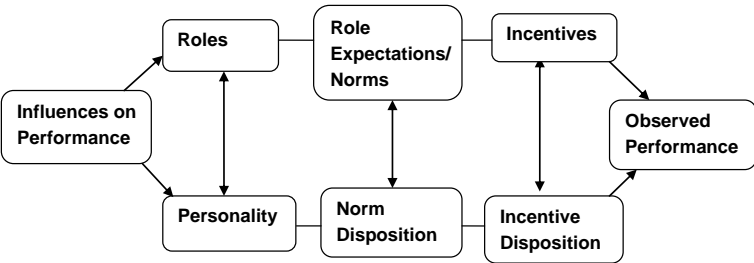

**Institutional  
Setting**

**Individual/Idiographic**

Supplement: MOESM2 [file 9569906]
